# Supplementary material for: Impact of Initial Body Weight Loss on Prognosis in Advanced Pancreatic Cancer: Insights From a Single-Center Retrospective Study
Source: PubMed Central journal article supplement — Cancer Control. 2023 Sep 25;30:10732748231204719. doi: 10.1177/10732748231204719 (PMC10521268; doi:10.1177/10732748231204719), 2023-09-25
Supplement: sj-pdf-1-ccx-10.1177_10732748231204719.pdf [file sj-pdf-1-ccx-10.1177_10732748231204719.pdf]

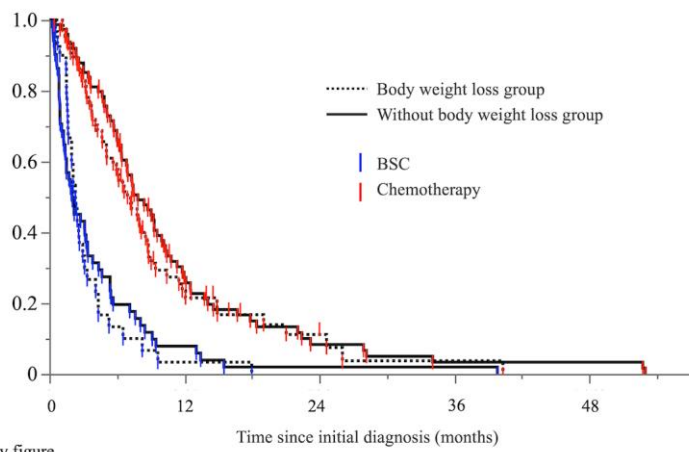

Supplementary figure

Supplementary figure. The overall survival curves of patients with and without body weight loss receiving BSC and chemotherapy.

The Kaplan-Meier curve points do not indicate censoring but rather the observation period and treatment of each case.
